# Supplementary material for: Niche TWIST1 is critical for maintaining normal hematopoiesis and impeding leukemia progression
Source: PubMed Central journal article supplement — Haematologica. 2018 Jul 19;103(12):1969–79. doi: 10.3324/haematol.2018.190652 (PMC6269292; doi:10.3324/haematol.2018.190652), 2018-12
Supplement: 2018_190652-Disclosures_and_Contributions.pdf [file 2018_190652-Disclosures_and_Contributions.pdf]

Haematologica  
HAEMATOL/2018/190652  
Version 4

Niche TWIST1 is critical for maintaining normal hematopoiesis and  
impeding leukemia progression

Xiaoyan Liu, Yanping Ma, Rongrong Li, Dan Guo, Nan Wang,  
Yangyang Zhao, Jing Yin, Qian Ren, Yongmin Lin, and Xiaotong Ma

Disclosures: none

Contributions: X.L. and X.M. designed the research; X.L., Y.M., R.L., D.G. and J.Y. performed the research, collected and analyzed data; N.W. and Y.Z. performed statistical analysis of the data; Q.R. and Y.L. provided reagents and materials; X.L. and X.M. wrote the manuscript.
