# Supplementary material for: Niche TWIST1 is critical for maintaining normal hematopoiesis and impeding leukemia progression
Source: PubMed Central journal article supplement — Haematologica. 2018 Jul 19;103(12):1969–79. doi: 10.3324/haematol.2018.190652 (PMC6269292; doi:10.3324/haematol.2018.190652), 2018-12

**Twist1 deletion remarkably changes the niche cellular components and factors, causing severe dysfunction of normal HSC and promoting AML progression**

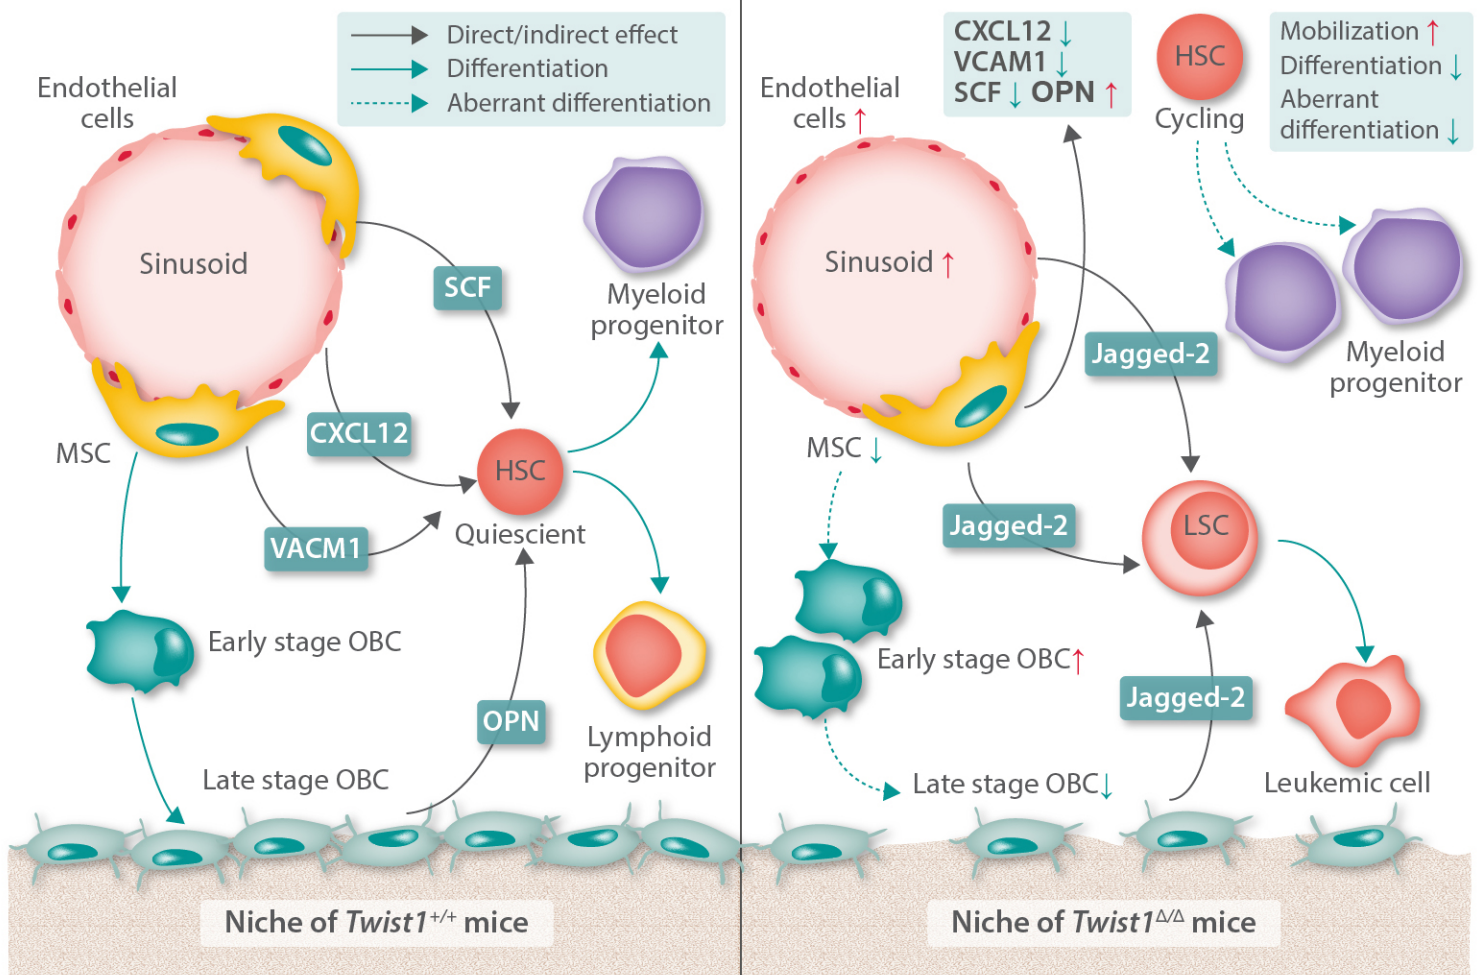

Supplement: HAEMATOL-2018-190652v4-Ma-01.pdf [file HAEMATOL-2018-190652v4-Ma-01.pdf]
